# Supplementary material
Source: publisher site journal article supplement (https://www.dovepress.com/article/309408)
Supplement: Supplementary file 1 [file get_supplementary_file.php]

|         |        |        |        |           |        |          |        |         |          |        |
|---------|--------|--------|--------|-----------|--------|----------|--------|---------|----------|--------|
| ABL1    | BLNK   | CDKN2B | DNM2   | FYN       | JAK2   | NF1      | PRKCB  | SMARCA4 | FAM46C   | ZNF292 |
| ANKRD26 | BRAF   | CDKN2C | DNMT3A | GATA1     | JAK3   | NFKB1    | PTEN   | SMARCB1 | TET1     | ZRSR2  |
| APC     | BRCA1  | CEBPA  | ECT2L  | GATA2     | KANSL1 | NFKB2    | PTPN1  | SMC1A   | TET2     |        |
| ARAF    | BRCA2  | CEBPE  | EED    | GATA3     | KDM6A  | NFKBIE   | PTPN11 | SMC2    | TNFAIP3  |        |
| ARC     | BRCC3  | CHD8   | EGFR   | GNA13     | KIT    | NOTCH1   | PTPRD  | SMC3    | TNFRSF14 |        |
| ARID1A  | BTG1   | CIITA  | EGR1   | GNAI2     | KLF2   | NOTCH2   | PTPRK  | SOCS1   | TNFRSF1B |        |
| ARID1B  | BTK    | CRBN   | EGR2   | HACE1     | KMT2A  | NPM1     | RAD21  | SOS1    | TP53     |        |
| ARID2   | CALR   | CREBBP | EP300  | HNRNPA2B1 | KMT2C  | NRAS     | RAF1   | SPEN    | TP63     |        |
| ARID5B  | CARD11 | CRLF2  | EPHA7  | HRAS      | KMT2D  | NT5C2    | RB1    | SRP72   | TP73     |        |
| ASXL1   | CBL    | CSF1R  | EPOR   | ID3       | KRAS   | PAX5     | RELN   | SRSF2   | TRAF3    |        |
| ASXL2   | CCND1  | CSF3R  | ERBB3  | IDH1      | MAP2K1 | PDCD1LG2 | RET    | STAG2   | TYK2     |        |
| ASXL3   | CCND2  | CSMD1  | ETNK1  | IDH2      | MAPK1  | PDGFRA   | RHOA   | STAT1   | U2AF1    |        |
| ATG5    | CCND3  | CTCF   | ETV6   | IGLL5     | MECOM  | PDGFRB   | RPS15  | STAT2   | UNC13D   |        |
| ATG2B   | CCR4   | CTLA4  | EZH2   | IKZF1     | MED12  | PHF6     | RRAGC  | STAT3   | VAV1     |        |
| ATM     | CCR7   | CTNNB1 | FAS    | IKZF2     | MEF2B  | PIGA     | RUNX1  | STAT4   | VHL      |        |
| ATRX    | CD274  | CUL4B  | FAT1   | IKZF3     | MET    | PIK3CA   | SAMHD1 | STAT5A  | VPREB1   |        |
| B2M     | CD28   | CXCR4  | FBXW7  | IL7R      | MFHAS1 | PIM1     | SETBP1 | STAT5B  | WT1      |        |
| BCL2    | CD58   | CYLD   | FGFR1  | INO80     | MGA    | PLCG1    | SETD2  | STAT6   | XPO1     |        |
| BCL6    | CD79A  | DDX3X  | FGFR3  | INPP5D    | MPL    | PLCG2    | SF3B1  | SUZ12   | ZAP70    |        |
| BCOR    | CD79B  | DDX41  | FLT3   | IRF4      | MUM1   | POT1     | SGK1   | SYK     | ZBTB7A   |        |
| BCORL1  | CDKN1A | DHX15  | FOXO1  | ITPKB     | MYC    | PPM1D    | SH2B3  | TBL1XR1 | ZEB2     |        |
| BIRC3   | CDKN2A | DIS3   | FOXO3  | JAK1      | MYD88  | PRDM1    | SH2D1A | TCF3    | ZMYM3    |        |

**Fig. S1. The sequenced genes of the specimen and its detection method.** The 222 genes important for lymphomagenesis included in the panel were listed in Fig. S1. Samples were sequenced using TSO500 library preparation kit on NextSeq550 platform.
